# Supplementary material
Source: Springer Nature journal article supplement (https://www.springermedizin.de/resource/supplementary/12961_2013_282_MOESM2_ESM.pdf/9570962)

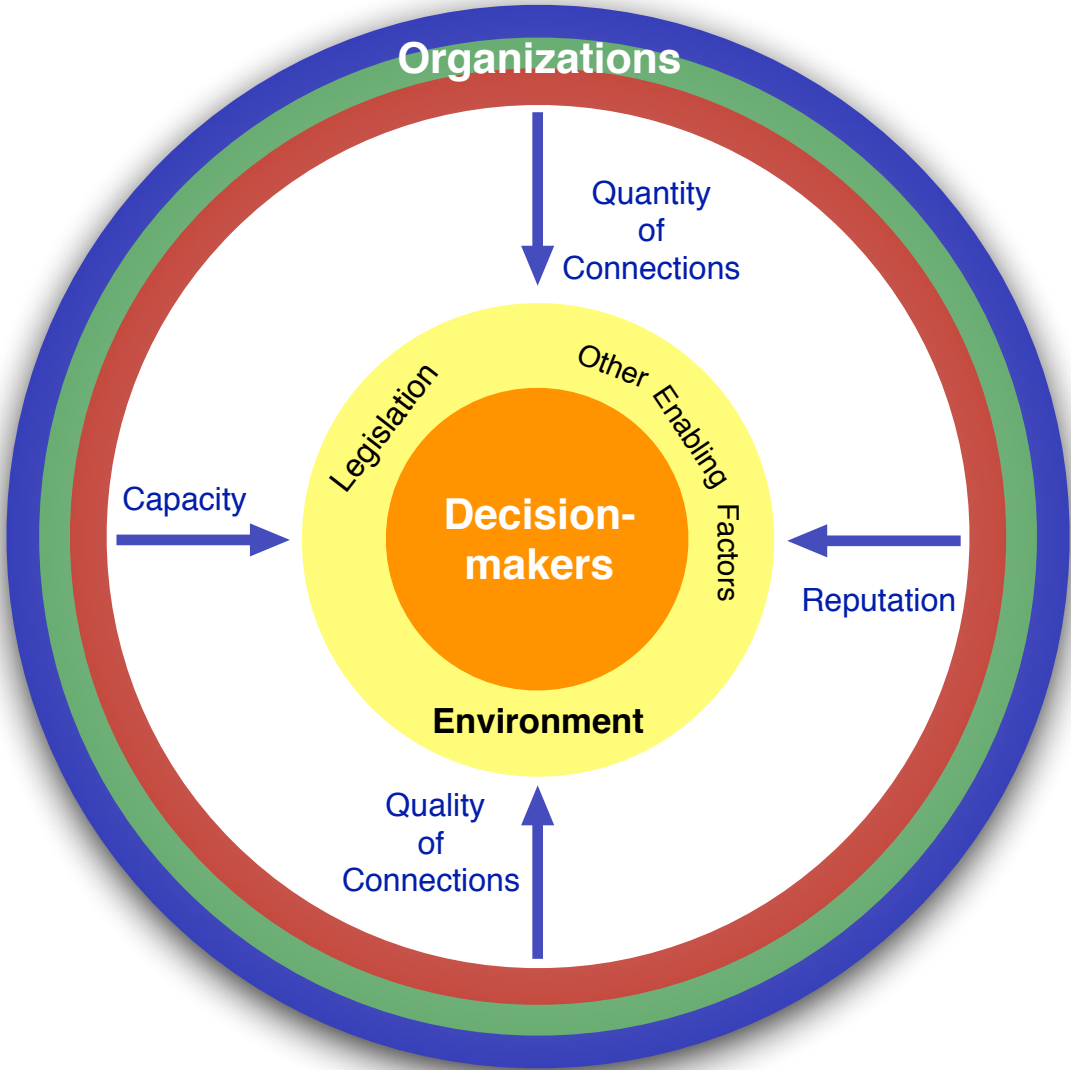

Supplement: MOESM2 [file 9570962]
